# Supplementary material for: Are Neutrophil Extracellular Traps Playing a Role in the Parasite Control in Active American Tegumentary Leishmaniasis Lesions?
Source: PubMed Central journal article supplement (PMC4508047; doi:10.1371/journal.pone.0133063), 2015-07-20
Supplement: pone.0133063.s006.pdf [file pone.0133063.s006.pdf]

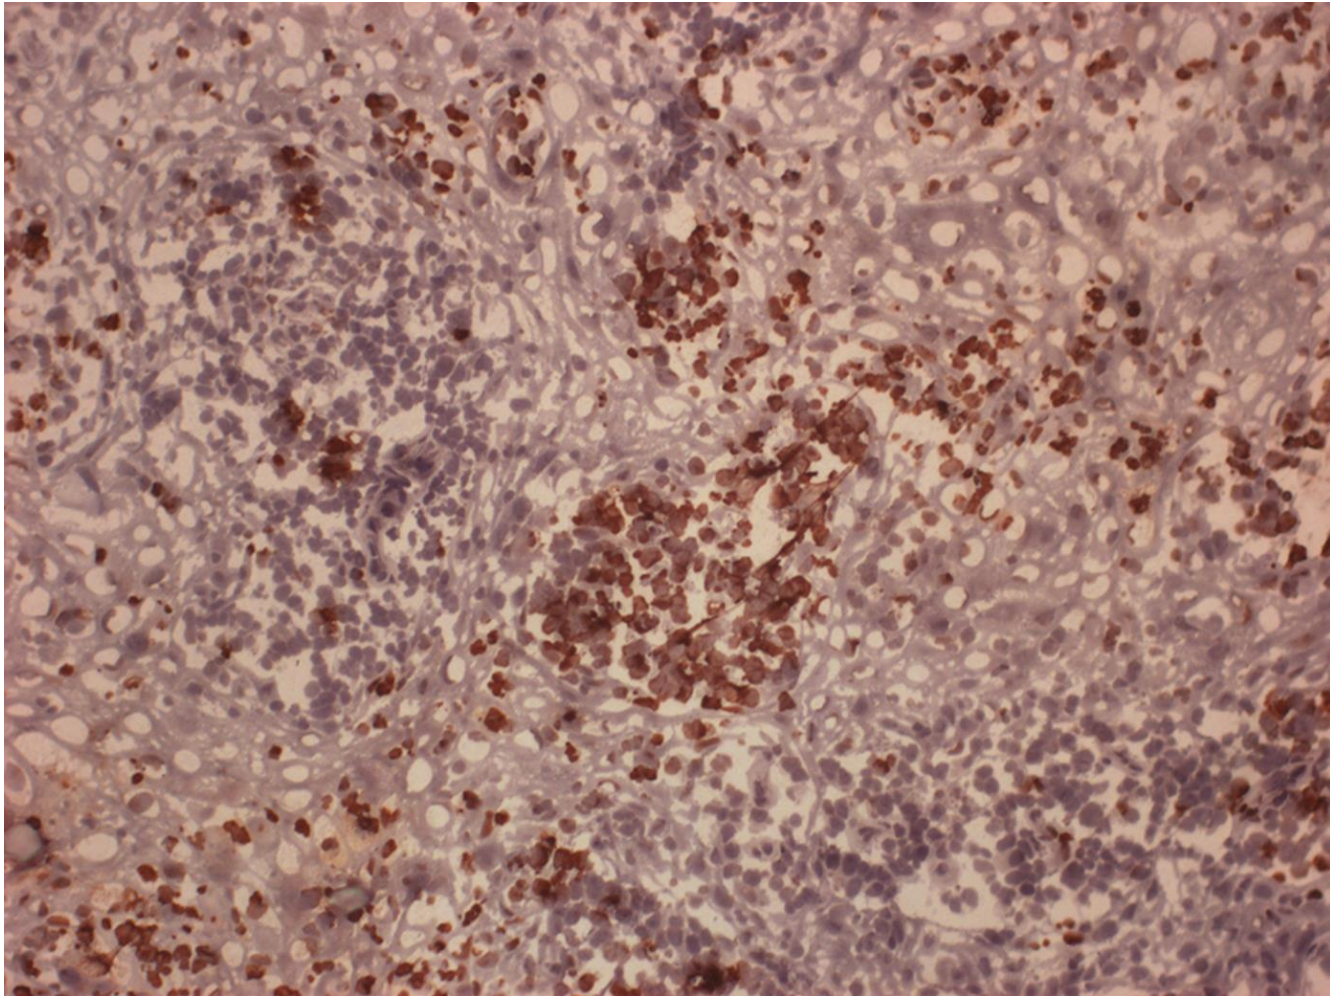

**S6 Fig. Neutrophil elastase and NET formation (brown).** Inflammatory infiltrate in skin lesions of American tegumentary leishmaniasis. Counterstain – Meyer`s hematoxylin; 200x magnification.
