# Supplementary material for: Are Neutrophil Extracellular Traps Playing a Role in the Parasite Control in Active American Tegumentary Leishmaniasis Lesions?
Source: PubMed Central journal article supplement (PMC4508047; doi:10.1371/journal.pone.0133063), 2015-07-20
Supplement: pone.0133063.s009.pdf [file pone.0133063.s009.pdf]

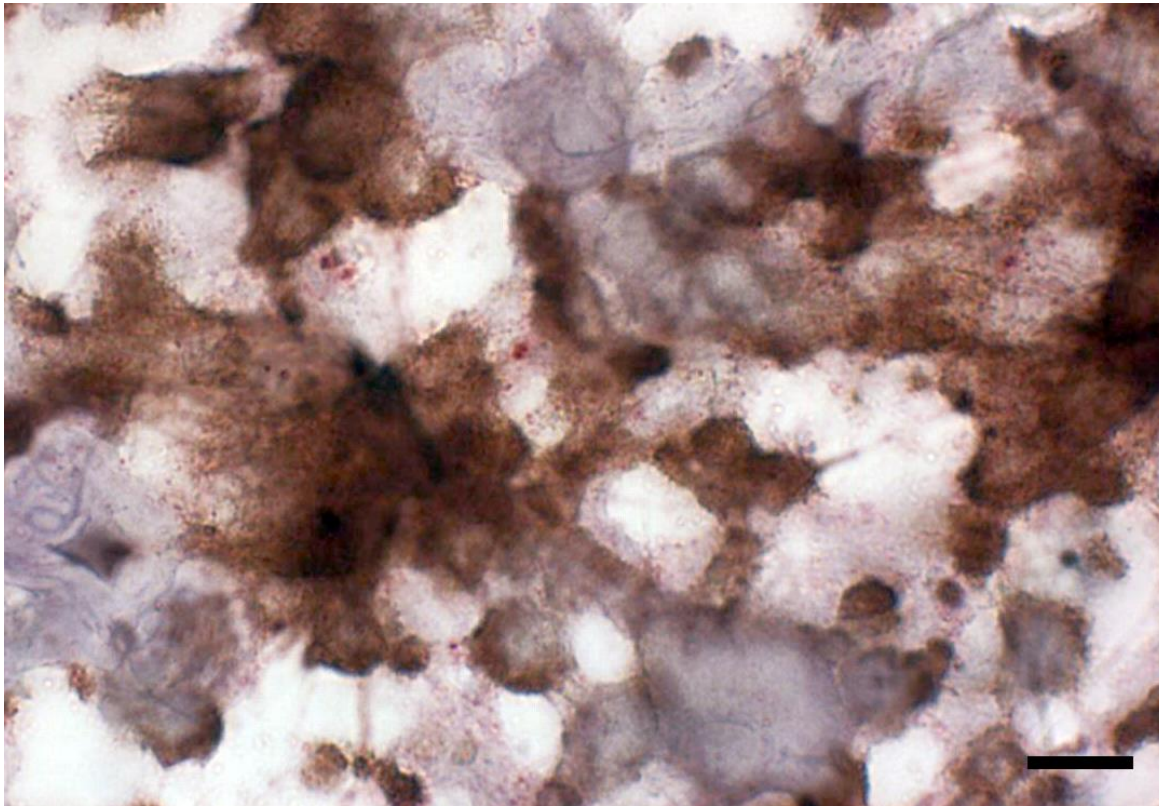

*Morgado et al*

**S9 Fig. Colocalization of neutrophil elastase (brown) and amastigotes (red).** Inflammatory infiltrate in skin lesions of American tegumentary Leishmaniasis. counterstain – Meyer`s hematoxilin. 1000x magnification
