# Supplementary material for: Are Neutrophil Extracellular Traps Playing a Role in the Parasite Control in Active American Tegumentary Leishmaniasis Lesions?
Source: PubMed Central journal article supplement (PMC4508047; doi:10.1371/journal.pone.0133063), 2015-07-20
Supplement: pone.0133063.s018.pdf [file pone.0133063.s018.pdf]

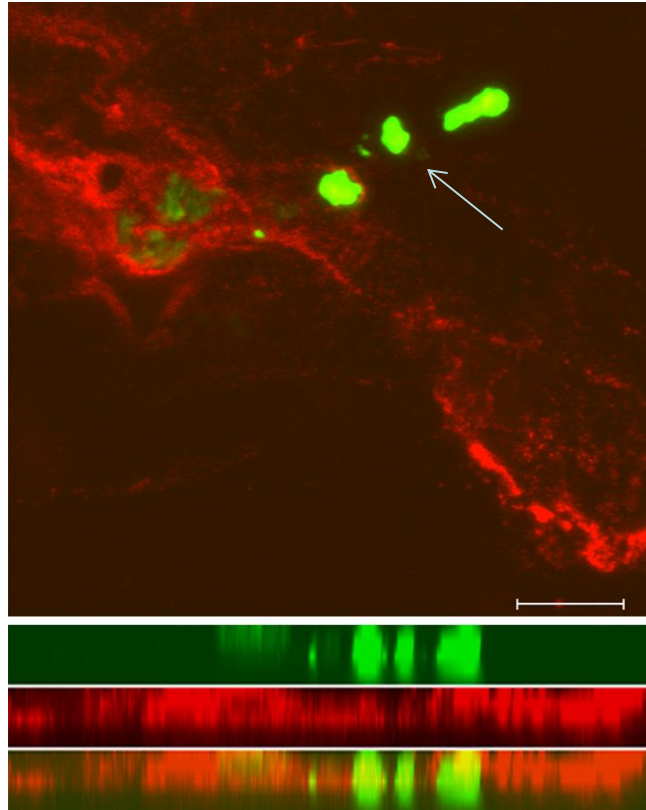

**S18 Fig. Colocalization analysis by confocal microscopy.** Neutrophil elastase (red) and amastigotes (green); Degraded amastigotes (arrow). Scale bar = 10um
